# Supplementary material for: Rabies Virus Populations in Humans and Mice Show Minor Inter-Host Variability within Various Central Nervous System Regions and Peripheral Tissues
Source: MDPI journal article supplement (doi:10.3390/v14122661), 2022-11-28
Supplement: s1 [file s1]

## Supplementary tables

**Table S1. Ct values of the independent samples selected for viral sequencing. Successfully sequenced samples are indicated in green, non-successful in grey.**

| Mouse ID | CNS tissues |                     |                      |                       | Non-CNS tissues |                   |                |                 |
|----------|-------------|---------------------|----------------------|-----------------------|-----------------|-------------------|----------------|-----------------|
|          | Brain       | Trigeminal ganglion | Spinal cord - dorsal | Spinal cord - ventral | Nuccal skin     | Tongue epithelium | Salivary gland | Pharyngeal swab |
| 1        |             |                     |                      |                       |                 |                   | 29.82          | 34.71           |
| 2        |             |                     |                      |                       |                 |                   | 24.54          | 27.56           |
| 3        |             |                     |                      |                       |                 |                   | 26.85          | 28.97           |
| 4        |             |                     |                      |                       |                 |                   | 28.4           | 35.49           |
| 5        | 19.78       | 21.7                | 17.68                | 18.25                 | 32.89           | 28.28             | 30.07          |                 |
| 6        | 23.31       | 18.19               | 17.64                | 19.92                 | 33.12           | 29.64             | 29.7           |                 |
| 7        | 19.14       | 24.78               | 16.74                | 17.33                 | 29.64           | 31.18             | 31.38          |                 |
| 8        | 20.31       | 20.82               | 17.59                | 18.47                 | 30.88           | 27.45             | 26.25          |                 |
| 9        | 21.61       | 19.12               | 17.86                | 17                    | 28.8            | 23.97             | 27.42          |                 |
| 10       | 22.04       | 19.63               | 17.22                | 19.32                 | 33.38           | 29.59             | 29.33          |                 |

**Table S2. Abundance of the observed minor variants (in percentages) detected in the various mice tissues. Yellow cells indicate a SNP.**

[illegible]

|    |                       |  |  |  |  |      |      |  |      |      |      |      |      |      |  |  |
|----|-----------------------|--|--|--|--|------|------|--|------|------|------|------|------|------|--|--|
| 7  | Spinal cord - ventral |  |  |  |  |      |      |  |      |      |      |      |      |      |  |  |
| 7  | Nuchal skin           |  |  |  |  |      |      |  |      |      |      |      |      |      |  |  |
| 8  | Brain                 |  |  |  |  |      |      |  |      | 41.3 |      |      |      |      |  |  |
| 8  | Trigeminal ganglion   |  |  |  |  |      |      |  | 29.1 | >50  |      |      |      |      |  |  |
| 8  | Spinal cord - dorsal  |  |  |  |  |      |      |  |      | 44.7 |      |      |      |      |  |  |
| 8  | Spinal cord - ventral |  |  |  |  |      |      |  |      | 36.5 |      |      |      |      |  |  |
| 8  | Nuchal skin           |  |  |  |  |      |      |  |      | 21.9 |      |      |      |      |  |  |
| 8  | Tongue epithelium     |  |  |  |  |      |      |  | 33.2 | >50  |      |      |      |      |  |  |
| 8  | Salivary gland        |  |  |  |  |      |      |  |      |      |      |      |      |      |  |  |
| 9  | Brain                 |  |  |  |  |      |      |  |      |      |      |      |      |      |  |  |
| 9  | Trigeminal ganglion   |  |  |  |  |      |      |  |      |      |      |      |      |      |  |  |
| 9  | Spinal cord - dorsal  |  |  |  |  |      |      |  |      |      |      |      |      |      |  |  |
| 9  | Spinal cord - ventral |  |  |  |  |      |      |  |      |      |      |      |      |      |  |  |
| 9  | Nuchal skin           |  |  |  |  |      |      |  |      |      |      |      |      |      |  |  |
| 9  | Tongue epithelium     |  |  |  |  |      |      |  |      |      |      |      |      |      |  |  |
| 9  | Salivary gland        |  |  |  |  |      |      |  |      |      |      |      |      |      |  |  |
| 10 | Brain                 |  |  |  |  | 27.2 |      |  |      |      | 26.7 |      |      | 20.5 |  |  |
| 10 | Trigeminal ganglion   |  |  |  |  | 35.5 |      |  |      | 34.4 | 27.4 |      |      | 37.1 |  |  |
| 10 | Spinal cord - dorsal  |  |  |  |  | >50  | 36.5 |  |      |      | >50  | 39.5 | 32.4 | >50  |  |  |
| 10 | Spinal cord - ventral |  |  |  |  | >50  | 38.0 |  |      |      | >50  | 34.8 | 37.0 | >50  |  |  |
